1 Serotonin and neuropeptides are both released by the HSN  
2 command neuron to initiate *C. elegans* egg laying

3

4 Short title: Serotonin and a neuropeptide cotransmitter in *C. elegans*

5

6 Jacob Brewer<sup>1</sup>, Kevin M. Collins<sup>2</sup>, Michael R. Koelle<sup>1\*</sup>

7

8 <sup>1</sup>Department of Molecular Biophysics & Biochemistry, Yale University, New  
9 Haven, Connecticut, United States of America

10

11 <sup>2</sup>Department of Biology, University of Miami, Coral Gables, Florida, United States  
12 of America

13

14

15 \* Corresponding author

16 E-Mail: [michael.koelle@yale.edu](mailto:michael.koelle@yale.edu) (MRK)

## 17 **Abstract**

18 Neurons typically release both a small molecule neurotransmitter and one or  
19 more neuropeptides, but how these two types of signal from the same neuron  
20 might act together remains largely obscure. For example, serotonergic neurons in  
21 mammalian brain express the neuropeptide Substance P, but it is unclear how  
22 serotonin signaling might be modulated by a coreleased neuropeptide. We  
23 studied this issue in *C. elegans*, in which all serotonergic neurons express the  
24 neuropeptide NLP-3. The serotonergic Hermaphrodite Specific Neurons (HSNs)  
25 are command motor neurons within the egg-laying circuit that have previously  
26 been shown to release serotonin to initiate egg-laying behavior. We found that  
27 egg-laying defects in animals lacking serotonin were far milder than in animals  
28 lacking HSNs, suggesting that HSNs must release other signal(s) in addition to  
29 serotonin to stimulate egg laying. While null mutants for *nlp-3* had only mild egg-  
30 laying defects, animals lacking both serotonin and NLP-3 had severe defects, like  
31 those of animals lacking HSNs. Optogenetic activation of HSNs induced egg  
32 laying in wild-type animals, or in mutant animals lacking either serotonin or NLP-  
33 3, but failed to induce egg laying in animals lacking both. We recorded calcium  
34 activity in the egg-laying muscles of animals lacking either serotonin, NLP-3, or  
35 both. The single mutants, and to a greater extent the double mutant, showed  
36 muscle activity that was uncoordinated and unable to expel eggs, such that the  
37 vm2 muscles cells that are direct postsynaptic targets of the HSN failed to  
38 contract simultaneously with other egg-laying muscle cells. Our results show that

39 the HSN neurons use serotonin and the neuropeptide NLP-3 as partially  
40 redundant cotransmitters that together stimulate and coordinate activity of the  
41 target cells onto which they are released.

42

## 43 **Author Summary**

44 Activity of the brain results from neurons communicating with each other using  
45 chemical signals. A typical neuron releases two kinds of chemical signals: a  
46 neurotransmitter, such as serotonin, and one or more small proteins, called  
47 neuropeptides. For example, many human brain neurons that release serotonin,  
48 a neurotransmitter thought to be involved in depression, also release the  
49 neuropeptide Substance P. Neuroscientists have typically studied the effects of  
50 neurotransmitters and neuropeptides separately, without considering how a  
51 neuron might use the two types of signals together. Here we analyzed how  
52 specific neurons in the model organism *C. elegans* use both serotonin and a  
53 neuropeptide together. The Hermaphrodite Specific Neurons (HSNs) activate a  
54 small group of neurons and muscles to generate egg-laying behavior. Killing the  
55 HSNs resulted in animals unable to lay eggs, but we found that eliminating either  
56 serotonin or the neuropeptide resulted in HSNs that still remained able to activate  
57 egg laying. However, eliminating both serotonin and the neuropeptide resulted in  
58 HSNs unable to activate coordinated contractions of the egg-laying muscles. Our  
59 results show that in a living animal, serotonin acts in concert with a coreleased  
60 neuropeptide to carry out its functions.

61

## 62 **Introduction**

63 Drugs that selectively manipulate serotonin signaling are widely used to treat  
64 depression and other psychiatric disorders, yet these drugs are often ineffective,  
65 and no specific molecular defects in serotonin signaling have been identified as  
66 the cause of these disorders (1). This situation suggests there is more to  
67 understand about the basic science of serotonin signaling that could help explain  
68 the cause of many psychiatric disorders. One feature of serotonin signaling in the  
69 mammalian brain that remains poorly understood is that serotonin neurons  
70 appear to also release a specific neuropeptide, Substance P (2–6). Of the ~80  
71 billion neurons in the human brain, only about 100,000 make serotonin: their cell  
72 bodies are concentrated in the raphe nuclei of the brain stem, but extend axons  
73 throughout the brain that release serotonin to influence many brain functions  
74 (2,7,8). Several methods have been used to measure the proportion of serotonin  
75 neurons that express Substance P in the various raphe subnuclei of human or rat  
76 brain, with results suggesting that from 25% to nearly all serotonin neurons also  
77 express substance P (2,5,9,10). The apparent co-release of serotonin and  
78 Substance P from the same neurons is just one instance of the broad but poorly  
79 studied phenomenon of cotransmission by small-molecule neurotransmitters and  
80 neuropeptides (11–14). It remains unclear how exactly coreleased serotonin and  
81 neuropeptide might functionally interact. Clinical studies of Substance P  
82 antagonists showed that they, like selective serotonin reuptake inhibitors, can  
83 have significant anti-depressant activity (15–17). One study in the brain stem

84 respiratory circuit indicated that serotonin and substance P each independently  
85 stimulate activity of the circuit (10), but the complexity of mammalian brain  
86 circuits makes precise analysis of such effects difficult.

87 Small neural circuits of invertebrates provide the potential for more precise  
88 analysis of the functional effects of cotransmission. In such circuits, every cell  
89 can be identified, the small molecule neurotransmitter and neuropeptide content  
90 of each cell can be determined, and the functional effects of each signal can  
91 potentially be characterized. An elegant body of work on small circuits from  
92 crustaceans has used pharmacological and electrophysiological methods to  
93 analyze the functional effects of cotransmitters (11). However, the nature of these  
94 experimental systems typically requires that the isolated circuit be studied after  
95 dissection from the animal.

96 *C. elegans* provides the opportunity to use powerful genetic methods to  
97 functionally analyze cotransmission within small circuits of intact, behaving  
98 animals. Thus mutations and transgenes can manipulate neurotransmitters,  
99 neuropeptides, and their receptors, optogenetic methods can manipulate activity  
100 of presynaptic cells, and the functional consequences of all these manipulations  
101 can be read out in behavioral effects and using genetically-encoded calcium  
102 indicators to measure activity of postsynaptic cells. So far, there has been limited  
103 use of this approach to study cotransmission (18,19). One such study examined  
104 an olfactory neuron that releases glutamate to evoke a behavioral response to

105 odor. This neuron coreleases a neuropeptide to activate a feedback loop to  
106 dampen activity of the olfactory neuron on specific timescales (18).

107       Here, we have applied the genetic toolbox described above to analyze the  
108 functional consequences of cotransmission by serotonin and a neuropeptide  
109 within a well-characterized small circuit of *C. elegans*. The *C. elegans* egg-laying  
110 circuit contains three neuron types that release neurotransmitters onto egg-laying  
111 muscles and each other to generate ~two minute active phases, during which  
112 rhythmic circuit activity induces egg-laying behavior, that alternate with ~20  
113 inactive phases, during which the circuit is largely silent and no eggs are laid  
114 (20). The two serotonergic hermaphrodite specific neurons (HSNs) serve as the  
115 command neurons (21) within this circuit in that 1) worms lacking HSNs are egg-  
116 laying defective (22); 2) optogenetic activation of HSNs is sufficient to induce  
117 activity of the circuit that mimics a spontaneous active phase (23–25); 3) no other  
118 cells in the circuit have these properties (25). We show here that the HSNs use a  
119 combination of serotonin and a neuropeptide to induce the coordinated circuit  
120 activity of egg-laying active phases.

## 121 **Results**

### 122 **The serotonergic HSN egg-laying neurons remain largely functional** 123 **without serotonin**

124 The small circuit that initiates egg-laying behavior is schematized in Fig 1A. The  
125 serotonergic Hermaphrodite-Specific Neurons (HSNs), along with the cholinergic  
126 Ventral Cord type C neurons (VCs), synapse onto the type 2 vulval muscles  
127 (vm2), which are electrically coupled by gap junctions to the type 1 vulval  
128 muscles (vm1) and contract with them to expel eggs (20). Loss of the HSNs  
129 results in a severe egg-laying defect: a mutation in *egl-1* causes death of the  
130 HSNs and results in animals that continue to make eggs but rarely lay them (26),  
131 resulting in the striking phenotype of adult worms distended with accumulated  
132 unlaidd eggs (Fig 1B and 1C). Because addition of exogenous serotonin to worm  
133 culture media is sufficient to induce egg laying, even in worms lacking HSNs (22),  
134 it has been suggested that HSNs induce circuit activity simply by releasing  
135 serotonin, sensitizing the egg-laying muscles to activation by the acetylcholine  
136 released by other motorneurons of the circuit (25,27).

137 Contrary to this model, we found that animals lacking serotonin (Fig 1D)  
138 had only mild egg-laying defects. The *tph-1* gene encodes the serotonin  
139 biosynthetic enzyme tryptophan hydroxylase, and animals with a *tph-1* null  
140 mutation have no serotonin detectable by anti-serotonin antibodies or HPLC  
141 analysis (28,29). *tph-1* mutant animals had only mild egg-laying defects (~18  
142 unlaidd eggs), appearing more similar to wild type (~12 unlaidd eggs) than they did



143 to *egl-1* mutants lacking HSNs (~47 unlaidd eggs; Fig 1B-1D). This result, along  
144 with previous pharmacological, genetic, and behavioral studies of the function of  
145 serotonin in egg laying (30), are consistent with the idea that serotonin release  
146 can only partially explain how the HSNs initiate egg laying.

147 To determine definitively if serotonin is required for the HSNs to stimulate  
148 egg laying, we optogenetically stimulated the HSNs of animals either wild-type for  
149 *tph-1* or deleted for the *tph-1* gene (Fig 1E). Animals with channelrhodopsin  
150 (ChR2) expressed in the HSNs and that are wild-type for *tph-1* have been shown  
151 previously to lay eggs within a few seconds of exposure to blue light, but only if  
152 the required ChR2 cofactor all-trans retinal (ATR) is supplied to the worms  
153 (23,24). We found that upon optogenetic activation of HSNs, *tph-1* mutant  
154 animals laid a number of eggs statistically indistinguishable from the number laid  
155 by control animals wild-type for *tph-1* (Fig 1E). Thus the HSNs do not require  
156 serotonin to stimulate egg-laying behavior.

157

158 **The neuropeptide gene *nlp-3* stimulates egg laying, and loss of both *nlp-3***  
159 **and serotonin together severely reduces egg laying**

160 Our results, along with previous studies (30–33), lead to the hypothesis  
161 that the HSN releases a cotransmitter that allows the HSNs to stimulate egg  
162 laying without serotonin. We thought that this cotransmitter could be one or more  
163 neuropeptides encoded by the five neuropeptide genes previously shown to be  
164 expressed in the HSNs (34–36). To test this idea we created five types of

165 transgenic worm strains, each overexpressing one of these neuropeptide genes.  
166 Each strain we created carried an extrachromosomal transgene containing  
167 multiple copies of a ~45 kb *C. elegans* genomic DNA clone containing one  
168 neuropeptide gene. Overexpressing a neuropeptide gene can result in a gain-of-  
169 function phenotype caused by an increase in the normal signaling effects of the  
170 encoded neuropeptides (19,37). For a neuropeptide that induces egg laying, we  
171 expected overexpression to cause an increase in the frequency of egg-laying  
172 behavior.

173 We found that overexpressing the *nlp-3* neuropeptide gene resulted in a  
174 dramatic increase in the frequency of egg-laying behavior. An increased rate of  
175 egg-laying behavior results in an increased number of eggs being laid at early  
176 stages of development, since the eggs have little time to develop inside the  
177 mother before they are laid (38). More than 80% of the eggs laid by worms  
178 carrying the high-copy *nlp-3* transgene were laid at early stages of development,  
179 compared to about 5% for control animals not overexpressing any neuropeptide  
180 (Fig 2A). We saw no such phenotype for worms overexpressing any of the other  
181 four neuropeptide genes (Fig 2A).

182 We obtained *nlp-3* null mutant animals in which the *nlp-3* gene is deleted.  
183 Unlike the *egl-1* mutants lacking HSNs that accumulate ~47 unlaidd eggs (Fig 1C),  
184 *nlp-3* null mutants accumulated only ~19 unlaidd eggs (Fig 2B), and thus were  
185 more similar to the wild type (Fig 1B) or *tph-1* mutant worms lacking serotonin  
186 (Fig 1D). However, when we made *tph-1; nlp-3* double mutant so that the HSNs

187 lacked both serotonin and NLP-3 neuropeptides, the adult animals were  
188 distended with ~42 unlaidd eggs and thus showed a severe egg-laying defect  
189 similar to that of *egl-1* animals. We obtained a second, independent deletion  
190 mutant for *nlp-3* and observed the same mild defect in the single mutant and the  
191 same severe defect in the double mutant with *tph-1* (Fig 2D).

192

193 **The HSN egg-laying neurons use both serotonin and NLP-3 neuropeptides**  
194 **to stimulate egg laying**

195 The above experiments demonstrated that serotonin and NLP-3 stimulate  
196 egg laying but did not examine if they do so by being released from the HSN  
197 neurons. Previous studies demonstrated that HSNs contain serotonin, and it was  
198 inferred from indirect evidence that HSNs can release serotonin to stimulate egg  
199 laying (22,39,40), although our results presented in Fig 1 show that HSNs do not  
200 require serotonin to stimulate egg laying. We used the *nlp-3* promoter to drive  
201 GFP expression and saw, as previously reported (41), that *nlp-3* is expressed in  
202 the HSN neurons but no other cells of the egg-laying circuit (Fig 3A), consistent  
203 with the hypothesis that NLP-3 neuropeptides are released from HSNs to  
204 stimulate egg laying.

205 To directly test what combination of transmitters the HSNs use to stimulate  
206 egg laying, we generated animals that express ChR-2::YFP in the HSN neurons  
207 (Fig 3B) and that were wild-type for *tph-1* and *nlp-3* (controls), or that carried null  
208 mutations in *tph-1*, *nlp-3*, or both. We then tested whether optogenetic stimulation

209 of the HSNs could induce egg laying. Both the control animals and null mutants  
210 for *tph-1* laid eggs readily upon ChR2 activation, with no statistically significant  
211 differences in the number of eggs laid (Fig 3C), or in several other measures of  
212 the egg-laying behavior induced (e.g. time to first egg laid, time to last egg laid,  
213 Fig S2A-S2C). However, whereas all wild-type and *tph-1* animals tested laid eggs  
214 upon ChR2 activation, 7/20 *nlp-3* mutant animals failed to lay any eggs, and the  
215 13/20 that did lay eggs laid fewer on average than did the wild-type or *tph-1*  
216 animals. No eggs were laid by any *tph-1; nlp-3* double mutant animals (Fig 3C).  
217 Therefore, we conclude that the HSN neurons release both serotonin and NLP-3  
218 peptides to stimulate egg laying, either signal alone is sufficient to stimulate at  
219 least some egg laying, and when lacking both signals the HSNs have no  
220 detectable ability to stimulate the behavior.

221

222 **Serotonin and NLP-3 can each stimulate egg laying in the absence of the**  
223 **other**

224 To further investigate the relationship between serotonin and NLP-3 in activating  
225 egg-laying behavior, we performed additional experiments to test if either of  
226 these transmitters is required to allow the other to stimulate egg laying. For  
227 serotonin stimulation of egg laying, we used a standard assay (22) in which  
228 worms were placed in microtiter well containing plain buffer or buffer containing  
229 serotonin, and the number of eggs laid in 60 minutes was counted. We saw, as  
230 observed previously (39,42–44), that exogenous serotonin stimulates egg laying

231 in wild-type animals, but not in animals deleted for the serotonin receptor gene  
232 *ser-1* (Fig 4A). Null mutants for *nlp-3* were stimulated by serotonin to lay eggs at  
233 the same rate as were the wild-type controls, demonstrating that NLP-3 is not  
234 required for serotonin to stimulate egg laying.

235 We used a converse experiment to test if NLP-3 could stimulate egg-  
236 laying in the absence of serotonin. We generated *C. elegans* transgenes that  
237 overexpressed *nlp-3* by containing multiple copies of *nlp-3* genomic DNA, and  
238 control transgenes that did not overexpress *nlp-3*. In a strain background wild-  
239 type for *tph-1*, we observed (Fig 4B), as we had seen previously in an analogous  
240 experiment (Fig 2A), that overexpression of *nlp-3* resulted in hyperactive egg  
241 laying as evidenced by a high percentage of early-stage eggs laid. When we  
242 carried out this same experiment in a *tph-1* null mutant, *nlp-3* overexpression  
243 also resulted in hyperactive egg laying, albeit at a modestly reduced level (Fig  
244 4B). Thus serotonin is not required to allow *nlp-3* overexpression to induce egg  
245 laying.

246

247 **Serotonin and NLP-3 together cause the HSN postsynaptic targets, the**  
248 **vm2 muscle cells, to contract coordinately with other egg-laying muscles**

249 To understand the functional effects of the HSN cotransmitters, we  
250 recorded  $Ca^{2+}$  activity of the vulval muscle cells, which are postsynaptic targets  
251 of the HSNs, in animals that were wild-type, lacked serotonin, lacked NLP-3, or  
252 lacked both. We thus coexpressed the  $Ca^{2+}$ -sensitive green fluorescent protein

253 GCaMP5 and the Ca<sup>2+</sup>-insensitive red fluorescent protein mCherry in the vm2  
254 muscle cells, the direct postsynaptic targets of the HSNs, and also in the vm1  
255 muscle cells, which are gap-junctioned to vm2 and have been thought to contract  
256 with vm2 to expel eggs (45). Using methods we previously developed (25,46,47),  
257 we carried out ratiometric fluorescence imaging of intact animals to measure Ca<sup>2+</sup>  
258 transients under conditions that allow egg-laying behavior to proceed as it does  
259 in standard lab culture, such that in wild-type animals, ~2 minute egg-laying  
260 active phases occur about every 20 minutes. Each animal was recorded for one  
261 hour. Fig 5A shows traces of Ca<sup>2+</sup> transients recorded for the entire ensemble of  
262 vm1 and vm2 cells together for three animals of each of the following genotypes:  
263 wild-type, *tph-1* and *nlp-3* single mutants, the *tph-1;nlp-3* double mutant, and *egl-*  
264 *1* animals lacking HSNs.

265 We observed frequent vulval muscle activity in all genotypes, with each  
266 genotype showing hundreds of Ca<sup>2+</sup> transients over the three hours recorded.  
267 However, in the wild-type less than 10% of the vulval muscle Ca<sup>2+</sup> transients  
268 resulted in egg release, and even fewer successful egg-laying events occurred in  
269 *tph-1* mutants lacking serotonin (*tph-1*) or in *nlp-3* mutants (30 eggs released  
270 over three hours for the wild type, compared to 15 for *tph-1* and 9 for *nlp-3*).  
271 Activity in animals lacking both serotonin and NLP-3 neuropeptides (*tph-1; nlp-3*)  
272 or lacking HSNs (*egl-1*) was actually more frequent than in the wild type, but very  
273 rarely produced successful egg release (each genotype released just two eggs in  
274 the three hours recorded).

275 To identify the differences between vulval muscle contractions that did or  
276 did not release eggs, we adjusted how we collected images during  $\text{Ca}^{2+}$   
277 recordings. Previously-published  $\text{Ca}^{2+}$  imaging of the vulval muscles used  
278 images focused at the center of the group of two vm1 and two vm2 muscles  
279 found on either the left or right side of the animal, and the resulting images  
280 showed  $\text{Ca}^{2+}$  activity that was usually focused at the most dorsal tip of this group  
281 of muscles, but that could not be assigned to individual muscle cells (25,46,47).  
282 By focusing more laterally on either the left or right set of vulval muscles, we  
283 could more clearly resolve individual vm1 and vm2 cells and determine which of  
284 the four muscle cells within the set were active during any given  $\text{Ca}^{2+}$  transient  
285 detected (Fig 5B). All of the data presented in Fig 5 and Fig S3 results from use  
286 of this more lateral focus.

287 The large majority of the muscle activity we observed in every genotype  
288 examined occurred exclusively in one both of the vm1s imaged, with no  
289 concurrent activity detected in the vm2s (Fig 5C). In the wild-type, 12% of  $\text{Ca}^{2+}$   
290 transients involved both vm1 and both vm2 cells imaged, and we refer to such  
291 events as "coordinated". We never observed an event in any genotype in which a  
292  $\text{Ca}^{2+}$  transient occurred exclusively in vm2 cell(s) without accompanying activity  
293 in vm1 cell(s). In the wild-type, coordinated vulval muscle contractions occurred  
294 exclusively within active phases, the ~2 minute intervals during which eggs were  
295 laid and that contained frequent vulval muscle transients (Fig 5A). All 30 egg  
296 release events observed in the wild type occurred during one of the 51

297 coordinated vulval muscle contractions we saw during the three hours of  
298 recordings analyzed. Thus it appears that coordinated contraction of all the vulval  
299 muscle cells is necessary for efficient egg release.

300 Mutants lacking serotonin, NLP-3, or both continued to show vm1 Ca<sup>2+</sup>  
301 transients at a rate similar to or even greater than seen in the wild-type, but a  
302 decreased portion of these events were accompanied by vm2 Ca<sup>2+</sup> transients to  
303 produce coordinated events (Fig 5C). This decrease in coordinated events was  
304 modest in *tph-1* and *nlp-3* single mutants, but severe in the *tph-1; nlp-3* double  
305 mutant and in *egl-1* animals lacking HSNs. In the mutants, as in the wild-type,  
306 egg release occurred almost only during coordinated events that included both  
307 vm1 and vm2 activity (Fig S3): we only observed one exceptional egg-release  
308 event that occurred in an *egl-1* animal during a vm1-only contraction. Thus the  
309 loss of vm2 activity in the mutants correlated strongly with the loss of successful  
310 egg laying. Thus, while vm1 calcium activity occurs in each genotype we  
311 observed, only wild-type animals, in which the HSN neurons were able to release  
312 both serotonin and NLP-3 neuropeptides onto vm2 cells, were able to frequently  
313 trigger coordinated activity in both vm1 and vm2 and efficiently lay eggs.

314



## 315 **Discussion**

### 316 **HSN command neurons release serotonin and NLP-3 neuropeptides to** 317 **activate and coordinate activity of the egg-laying circuit**

318 Our results show that serotonin and NLP-3 released by the HSNs induces  
319 activity of the vm2 muscle cells and coordinates their activity with that of the vm1  
320 muscles to productively release eggs. In wild-type animals, the egg-laying circuit  
321 alternates between ~20 minute inactive states during which no eggs are laid, and  
322 ~2-3 minute active states during which a few eggs are laid. Previous work  
323 (21,42,43) as well as results in this study show that there are occasional vm  
324 “twitch” Ca<sup>2+</sup> transients during the inactive state that do not release eggs, while  
325 there are robust, rhythmic vm transients during the active state, some of which  
326 release eggs. There are a total of four vm1 and four vm2 cells, with Fig. 1  
327 diagramming just the two of each type on the left side of the animal. Gap  
328 junctions are present among the vm1 and vm2 cells found either anterior or  
329 posterior to the vulva, but there are no gap junctions between the anterior and  
330 posterior sets of vm cells (45). A previous study (48) showed that egg-laying  
331 events always coincide with Ca<sup>2+</sup> transients that occur simultaneously in both  
332 anterior and posterior vm cells, while animals lacking HSNs fail to show such  
333 anterior/posterior vm coordination, potentially explaining the lack of efficient egg  
334 laying in animals lacking HSNs. It was assumed in such previous studies that the  
335 gap junctions between vm1 and vm2 muscle cells anterior or posterior on either

336 side of the vulva would efficiently electrically couple these cells so that they  
337 would contract as unit. In this study, we increased the spatial resolution of our  
338  $\text{Ca}^{2+}$  imaging and found that this assumption was incorrect. We observed that the  
339 vm twitch  $\text{Ca}^{2+}$  transients seen in the inactive state occur in some or all of the  
340 vm1 cells but are not detected in the vm2 cells. During the active state in wild-  
341 type animals, a subset of the rhythmic vm transients seen happen simultaneously  
342 in all vm1 and vm2 cells, and it is in turn a subset these “coordinated” events that  
343 result in egg release. Animals lacking the HSNs or the HSN-released signals  
344 continue to have vm1  $\text{Ca}^{2+}$  transients, but show a profound loss of vm2  $\text{Ca}^{2+}$   
345 transients. Thus the HSNs and their signals are not necessary for vm1 activity,  
346 which apparently are stimulated by other source(s), but the HSNs are critical for  
347 stimulating vm2 activity so that all vm cells can contract coordinately to  
348 productively release eggs.

349         The anatomy of the egg-laying circuit helps explain how the vm1 and vm2  
350 muscle cells are activated. Figure 6 diagrams the synapses and gap junctions  
351 among cells in the circuit as determined by serial section reconstruction of  
352 electron micrographs (EM) (45). The HSNs synapse onto the vm2 muscles, as do  
353 the cholinergic VC neurons. In past studies, HSN and VC were considered to be  
354 the primary motor neurons that stimulate the vm muscles, but our results show  
355 that the vm1 cells, which are not synaptic targets of HSN or VC neurons, are  
356 activated independently of vm2. What cells and signals then excite the vm1  
357 muscles?

358 We hypothesize that the VA and VB motor neurons are the source of  
359 excitation of the vm1 muscles, and also the central pattern generators that  
360 produce rhythmic activity of the egg-laying muscles. EM reconstruction (45)  
361 shows that the vm1 cells receive synapses from the cholinergic VA7 and VB6  
362 motor neurons, although these synapses have been disregarded in the past  
363 because they are much smaller than are the VC and HSN synapses onto vm2.  
364 VA and VB are ventral cord motor neuron classes that synaptically release  
365 acetylcholine onto the body wall muscles to coordinate the body bends of  
366 locomotion. Rhythmic behaviors such as locomotion generally require central  
367 pattern generator (CPG) neurons that are the source of their rhythmicity (49). VA  
368 and VB are rhythmically active and serve as CPGs that produce the pattern of  
369 body bends during locomotion (50). During the active state, egg laying is a  
370 repetitive behavior (27), and there must be a connection between the CPG for  
371 locomotion and the egg-laying circuit because repetitive vm activity is phased  
372 with the body bends of locomotion (25,46). Cholinergic activation of vm1 by  
373 VA/VB neurons would neatly explain both the source of vm1 activity and the  
374 source of the rhythmicity of vm activity. Previous work showed that vm muscles  
375 are apparently stimulated at a specific phase of every body bend, even during the  
376 inactive state, since mutations in specific  $K^+$  channels that normally reduce  
377 excitability of the vm cells result in increased rhythmic vm contractions, phased  
378 with body bends, during both the inactive and active egg-laying states. VA/VB  
379 neurons are active at a specific phase of each body bend (50) regardless of

380 whether animals are in the inactive or active state of the egg-laying system, and  
381 thus their pattern of activity exactly matches the pattern of activity inferred for the  
382 previously unknown source of vm activity.

383 We found that HSN neurons release serotonin and NLP-3 to initiate the  
384 egg-laying active state. Previous work showed that optogenetic activation of  
385 HSNs is sufficient to stimulate egg laying (24), and induces a pattern of activity in  
386 the VC neurons and in vm muscles reminiscent of activity seen during  
387 spontaneous active states (25). In this work, we found that optogenetic  
388 stimulation of HSNs lacking either serotonin or NLP-3 can still induce egg laying,  
389 but loss of both eliminates any egg laying response. Therefore, it appears that  
390 serotonin and NLP-3 together allow the HSNs to induce the active state of the  
391 egg-laying circuit. Examining spontaneous activity of the egg-laying circuit (i.e.  
392 without optogenetic activation of HSNs), we see that elimination of serotonin,  
393 NLP-3, both, or even killing the HSNs with an *egl-1* mutation does not eliminate  
394 egg-laying circuit activity. Indeed, vm  $Ca^{2+}$  activity remains high in these animals,  
395 and even includes activity in clusters, a property of the spontaneous active state  
396 seen in the wild type. However, the vm activity in animals lacking the HSN or its  
397 signals is uncoordinated, with  $Ca^{2+}$  transients mainly seen in vm1 cells only.  
398 Coordinated events with simultaneous  $Ca^{2+}$  transients in all vm cells that result in  
399 egg release occur on occasion, but these tend to be isolated events, as opposed  
400 to the groups of several coordinated egg-laying contractions that tend to occur  
401 within a 2-3 minute active phase in the wild type. The vm1-only activity seen in

402 mutants lacking the HSN or its signals could arise simply from direct release of  
403 acetylcholine onto vm1 cells by the VA/VB neurons. We also know from our  
404 previous work that it depends on an unknown signal released when the uterus  
405 contains unlaidd eggs (25): the bloating of the uterus with excess unlaidd eggs in  
406 animals lacking the HSNs or its signals may increase the uterus signal to result in  
407 the high levels of vm1-only activity seen in such animals.

408         How do HSNs use serotonin to produce vm2 contractions and the egg-  
409 laying active phase? The HSN and VC neurons make synapses onto muscle  
410 arms that project from all vm2 muscle cells, including those both anterior and  
411 posterior to the vulva. This anatomy ideally positions HSN and VC to stimulate  
412 vm2 contractions, and to do so such that both the anterior and posterior sets of  
413 vm cells contract simultaneously to productively release eggs. Previous studies  
414 showed that serotonin stimulates egg laying via the SER-1, SER-7, and SER-5 G  
415 protein coupled receptors (GPCRs), with potentially additional help from the  
416 MOD-1 serotonin-gated ion channel (51). Promoter::*GFP* transgenes for the *ser-*  
417 *1*, *ser-7*, and *ser-5* receptor genes show expression in the vm cells  
418 (32,42,44,51,52). The transgenic animals carrying these *GFP* reporters have not  
419 been examined carefully to determine which receptors are expressed in vm1  
420 versus vm2 cells, but the published images suggest that both vm1 and vm2  
421 express one or more of these GPCRs. No expression of *mod-1::GFP* has yet  
422 been seen in the egg-laying circuit (53). Thus, the anatomy of the egg-laying  
423 circuit and serotonin receptor expression patterns suggest that HSN-release

424 serotonin is released at synapses directly onto vm2 cells to activate these  
425 muscles via one or more GPCRs, and additionally activates vm1 cells  
426 extrasynaptically via one or more GPCRs. As a neuromodulator, serotonin could  
427 increase the excitability of vm1 cells and thus their depolarization upon release of  
428 acetylcholine onto vm1 by the VA/VB neurons. Serotonin could similarly act on  
429 vm2 cells to increase their response to acetylcholine released onto vm2 by the  
430 VC neurons, and/or their ability to respond to depolarization via gap junctions  
431 from vm1 cells.

432         How do HSNs use NLP-3 neuropeptides to produce vm2 contractions and  
433 the egg-laying active phase? Hypotheses for the action of NLP-3 are more  
434 speculative than are those for the action of serotonin, as NLP-3 receptors have  
435 not yet been identified, and we thus do not yet know which cells express these  
436 receptors. NLP-3 might act on the vm cells just as does serotonin, so that these  
437 two signals would activate the egg-laying circuit in the same manner. However, a  
438 more interesting hypothesis is that NLP-3 is the signal that the HSNs use to  
439 activate the VC neurons. Previous studies show that the VC neurons are  
440 essentially silent during the egg-laying inactive state, but become rhythmically  
441 active during the egg-laying active state, and that optogenetically activating the  
442 HSN neurons is sufficient to induce such activity of the VC neurons (52).  
443 Although the expression pattern of every known serotonin receptor in *C. elegans*  
444 has been described, none have so far been seen expressed on the VC neurons.  
445 Therefore, an attractive model is that NLP-3 is the HSN-released signal that acts

446 on the VC neurons to induce their activity. Active VC neurons would then release  
447 acetylcholine directly onto the vm2 muscles. In this way, HSN-released serotonin  
448 and NLP-3 would each have an independent mechanism for inducing vm2  
449 activity. The possible targets of signaling by serotonin and NLP-3 outlined in the  
450 model described above are depicted in Figure 6. This model is consistent with  
451 our experimental observations that HSN-released serotonin and NLP-3 can each  
452 independently induce egg laying.

453

454 **Co-release of small molecule neurotransmitters and neuropeptides is a**  
455 **widespread phenomenon**

456 The apparent co-release of serotonin and NLP-3 from the HSN neurons is  
457 just one instance of the broad but poorly-studied phenomenon of co-transmission  
458 by small-molecule neurotransmitters and neuropeptides. Neurons typically  
459 release one (or more rarely more than one) small molecule neurotransmitter from  
460 small synaptic vesicles (SSVs) (54,55), and release neuropeptides from large  
461 dense-core vesicles (LDCVs) (11,56). Certain small-molecule neurotransmitters,  
462 including serotonin, can also be found in LDCVs (54,55). SSVs and LCDVs can  
463 be localized in different parts of the cell and released by different mechanisms  
464 (55,57).

465 Most neurons release both small-molecule neurotransmitters and  
466 neuropeptides. This issue has been analyzed in greatest detail within the *C.*

467 *elegans* nervous system. There are 118 neuron types in *C. elegans*  
468 hermaphrodites, and 107 of them express one or more of the seven known small  
469 molecule neurotransmitters found in this organism (58). At least 95 *C. elegans*  
470 neuropeptide genes have been described, including 23 FLP genes encoding  
471 FMRFamide-related peptides, 32 NLP genes encoding neuropeptide-like  
472 proteins, and 40 INS genes encoding insulin-like peptides. Promoter::GFP fusion  
473 transgenes have been generated for all 95 of these neuropeptide genes to  
474 analyze their expression patterns. The individual neurons expressing each FLP  
475 gene were identified, and >50% of *C. elegans* neurons express at least one FLP  
476 peptide gene (35). The individual cells expressing each NLP and INS gene have  
477 not yet been identified, but images of the expression patterns show that the large  
478 majority of these peptide genes are expressed complex subsets of neurons  
479 (34,59). Thus, we can infer that the typical neuron in *C. elegans* releases one  
480 small-molecule neurotransmitter, and one or more type of neuropeptide.  
481 Similarly, the presence of both small molecule neurotransmitters and  
482 neuropeptides within the same individual neurons is widespread in both  
483 *Drosophila* (60,61) and in mammals (62).

484         The functional consequences of a neuron releasing two different types of  
485 signaling molecules have been difficult to study with precision in the complex  
486 circuits of the mammalian brain, but this issue has been the focus of many  
487 studies of small neural circuits in invertebrate model organisms (11,63). In such  
488 small circuits, individual presynaptic neurons that co-release a small molecule



489 neurotransmitter and neuropeptides can be identified, and the functional effects  
490 of each signal can be measured by bath application of neurotransmitter  
491 agonists/antagonists and/or neuropeptides, followed by measurements of circuit  
492 activity using electrophysiological methods. Such work has led to a rich set of  
493 findings, and many different schemes for the use of co-transmission within  
494 circuits (11,64). However, the limitations of these studies include that bath  
495 application of signaling molecules does not always mimic the effects of their  
496 release from neurons (11). Further, the electrophysiological recordings used  
497 require dissecting neural circuits out of the animal, replacing their extracellular  
498 fluid with an artificial solution, eliminating the movements that motor circuits  
499 normally induce and that provide proprioceptive feedback to these circuits, and  
500 impaling the recorded neurons with electrodes that dialyze their intracellular fluid,  
501 all of which may affect circuit function. The genetic approaches for analyzing co-  
502 transmission described in this work provides a useful complement to  
503 electrophysiological studies, as they permit us to manipulate endogenous  
504 signaling molecules with mutations and transgenes, to record circuit activity using  
505 genetically-encoded calcium indicators, and to manipulate neural activity using  
506 optogenetics, all within intact, freely-behaving animals. We are aware of just one  
507 previous study that focused on co-transmission using this combination of genetic  
508 approaches (18). In this pioneering study, an odor was shown to cause a *C.*  
509 *elegans* sensory neuron to release glutamate to act via ionotropic receptors on  
510 specific interneurons that further regulate a complex and incompletely

511 understood motor circuit to evoke a behavioral response to the odor. The same  
512 sensory neuron also releases a neuropeptide that acts via a G protein coupled  
513 receptor on a different interneuron to cause it to in turn release a second  
514 neuropeptide back onto the sensory neuron, limiting activity of the sensory  
515 neuron and the timescale of the behavioral response to the odor.

516 Our studies of co-transmission focus on the *C. elegans* egg-laying circuit  
517 because its anatomical simplicity holds the promise that all the cells and  
518 signaling events that control this circuit can be defined, something that has not  
519 yet been accomplished for any neural circuit. We discovered that serotonin and  
520 NLP-3 peptides released from the HSN command neurons have parallel and  
521 partially redundant effects to activate coordinated, rhythmic contraction of the  
522 egg-laying muscles. This finding may be analogous to results of some previous  
523 studies of co-transmission, in which the two co-released signals act convergently  
524 to increase activity the same target cells. The most relevant such example is in  
525 the mammalian brain respiratory circuit, where co-release of serotonin and the  
526 neuropeptide Substance P have parallel effects promoting rhythmic circuit activity  
527 (10). It will be interesting to determine just how mechanistically analogous these  
528 two cases of serotonin/neuropeptide co-transmission actually are, and whether  
529 the action of serotonin within the *C. elegans* egg-laying circuit will provide a  
530 model for the detailed workings of serotonin within neural circuits of the human  
531 brain.

532

## 533 **Methods**

### 534 ***C. elegans* strains**

535 *C. elegans* strains were cultured at 20°C on NGM agar plates with *E. coli* strain  
536 OP50 as a food source (66). All strains were derived from the Bristol N2 wild-type  
537 strain. Genetic crosses and generation of transgenic strains were by standard  
538 methods (67,68). A list of strains, mutants, and transgenes used in this study can  
539 be found in Table 1.

540 Gene deletion strains were for *nlp-3* (69), *tph-1* (70), and *ser-1* (42) were  
541 outcrossed four to ten times to the wild-type strain, as was the strain carrying an  
542 additional, previously unpublished *nlp-3* deletion allele, *tm3023*, which we  
543 obtained from the Japanese National Bioresource Project. It carries a 354 bp  
544 deletion that removes sequences flanked by the sequences  
545 GTCTGGACGGAAAGATCGTT...CGTGAGACTAGAAGTCCAC. Each gene  
546 deletion used removes a portion or all of the promoter and/or coding sequences  
547 of the corresponding gene such that no functional gene product is expected. The  
548 genotypes for all strains constructed using these deletions were verified by  
549 agarose gel analysis of PCR amplification products from the corresponding  
550 genes.

551

552

553

554 **Table 1. Strains used in this study.**

| Strain  | Feature                                           | Genotype                                                                               | Figures |
|---------|---------------------------------------------------|----------------------------------------------------------------------------------------|---------|
| N2      | Bristol strain                                    | Wild type                                                                              | 1,2     |
| MT2059  | Lacks HSN neurons                                 | <i>egl-1(n986dm)</i> V                                                                 | 1,2     |
| MT15434 | Lacks serotonin                                   | <i>tph-1(mg280)</i> II                                                                 | 1,2     |
| LX1836  | <i>egl-6::ChR2::YFP</i>                           | <i>wzls30 IV; lite-1(ce314) lin-15(n765ts)</i> X                                       | 1,3     |
| MT8189  | Strain for transgene production                   | <i>lin-15(n765ts)</i> X                                                                | 2       |
| LX1954  | <i>nlp-3</i> overexpressor                        | <i>lin-15(n765ts)</i> X ; <i>vsEx748</i>                                               | 2       |
| LX1955  | <i>nlp-8</i> overexpressor                        | <i>lin-15(n765ts)</i> X ; <i>vsEx749</i>                                               | 2       |
| LX1956  | <i>nlp-15</i> overexpressor                       | <i>lin-15(n765ts)</i> X ; <i>vsEx750</i>                                               | 2       |
| LX1957  | <i>flp-5</i> overexpressor                        | <i>lin-15(n765ts)</i> X ; <i>vsEx751</i>                                               | 2       |
| LX1981  | <i>flp-19</i> overexpressor                       | <i>lin-15(n765ts)</i> X ; <i>vsEx757</i>                                               | 2       |
| LX1978  | <i>nlp-3</i> null mutant                          | <i>nlp-3(tm3023)</i> X                                                                 | 2,4     |
| LX2366  | double mutant                                     | <i>tph-1(mg280)</i> II; <i>nlp-3(tm3023)</i> X                                         | 2       |
| LX2388  | <i>nlp-3</i> null mutant                          | <i>nlp-3(n4897)</i> X                                                                  | 2       |
| LX2389  | double mutant                                     | <i>tph-1(mg280)</i> II; <i>nlp-3(n4897)</i> X                                          | 2       |
| LX1836  |                                                   | <i>wzls30 IV; lite-1(ce314) lin-15(n765ts)</i> X                                       | 3       |
| LX1832  | mate to LX1836 for Fig 3C “control”               | <i>lite-1(ce314) lin-15(n765ts)</i> X                                                  | 3       |
| LX1837  |                                                   | <i>tph-1(mg280)</i> II; <i>wzls30 IV; lite-1(ce314) lin-15(n765ts)</i> X               | 3       |
| LX2335  | mate to LX1837 for Fig 3C “ <i>tph-1</i> ”        | <i>tph-1(mg280)</i> II; <i>lite-1(ce314) lin-15(n765ts)</i> X                          | 3       |
| LX2367  |                                                   | <i>wzls30 IV; lite-1(ce314) nlp-3(tm3023) lin-15(n765ts)</i> X                         | 3       |
| LX2364  | mate to LX2367 for Fig 3C “ <i>nlp-3</i> ”        | <i>lite-1(ce314) nlp-3(tm3023) lin-15(n765ts)</i> X                                    | 3       |
| LX2368  |                                                   | <i>tph-1(mg280)</i> II; <i>wzls30 IV; lite-1(ce314) nlp-3(tm3023) lin-15(n765ts)</i> X | 3       |
| LX2365  | mate to LX2368 for Fig 3C “ <i>tph-1; nlp-3</i> ” | <i>tph-1(mg280)</i> II; <i>lite-1(ce314) nlp-3(tm3023) lin-15(n765ts)</i> X            | 3       |
| DA1814  | Serotonin receptor 1 deletion                     | <i>ser-1(ok345)</i> X                                                                  | 4       |
| LX2392  | “control” in Fig 4B                               | <i>lin-15(nt65ts)</i> X; <i>vsEx885</i>                                                | 4       |
| LX2394  | “ <i>nlp-3 ox</i> ” in Fig 4B                     | <i>lin-15(nt65ts)</i> X; <i>vsEx887</i>                                                | 4       |
| LX2393  | “control in <i>tph-1</i> ” in Fig 4B              | <i>tph-1(mg280)</i> II; <i>lin-15(nt65ts)</i> X; <i>vsEx886</i>                        | 4       |
| LX2395  | “ <i>nlp-3 ox</i> in <i>tph-1</i> ” in Fig 4B     | <i>tph-1(mg280)</i> II; <i>lin-15(nt65ts)</i> X; <i>vsEx888</i>                        | 4       |

555

556 **Egg-laying behavioral assays**

557 Quantitation of unlaidd eggs in adult animals and percentage of early-stage eggs  
558 laid was done as described in (71), using adult animals 30 hours after staging as  
559 late L4 larvae.

560

561 **Optogenetic assays**

562 HSN neurons were optogenetically activated in animals carrying the *wzls30*  
563 transgene, which expresses a Channelrhodopsin-2::yellow fluorescent protein  
564 (ChR2::YFP) fusion in the HSN and a few other neurons unrelated to the egg-  
565 laying circuit from the *egl-6a* promoter (72,73). *wzls30* also carries a *lin-15*  
566 marker plasmid that rescues the multivulva phenotype of *lin-15* mutant animals.  
567 All animals used in optogenetic assay were also mutant for the *lite-1* gene to  
568 eliminate an endogenous response of *C. elegans* to blue light. The *wzls30*  
569 transgene was homozygous for the experiment shown in Fig 1E, but we noticed  
570 that the homozygous transgene caused developmental defects in the HSNs of  
571 some animals (Fig S1) that resulted in these animals being egg-laying defective.  
572 Therefore, for the experiment in Fig 1E, we examined the animals prior to  
573 optogenetic stimulation and discarded the small percentage of animals that were  
574 visibly egg-laying defective. The experiment shown in Fig 3C was carried out  
575 such that all animals were *wzls30/+* heterozygotes, which we found had  
576 morphologically normal HSNs (Fig S1). First we constructed the strains indicated  
577 in Table 1 that were homozygous for *wzls30* and also homozygous for the other

578 mutations required by the experiment. We generated males of each of these  
579 strains, and mated them to corresponding strains that were genetically identical  
580 except that they lacked *wzls30*. The cross progeny, identified by the presence of  
581 YFP-labeling, thus were heterozygous for *wzls30* but homozygous for all other  
582 mutations used in the experiment.

583 ChR2 expressing strains were grown in the presence or absence of the  
584 ChR2 cofactor all-trans retinal (ATR). ATR was prepared at 100 mM in 100%  
585 ethanol and stored at 20° C. To prepare NGM plates for behavior analysis, ATR  
586 was diluted to 0.4 mM with warmed cultures of OP50 bacteria in B Broth, and 200  
587 ml of culture was seeded onto each 60 mm NGM plate. The plates were allowed  
588 to grow for 24 hr at 25–37 °C, after which late L4 worms were staged onto  
589 prepared plates for behavioral assays 24 hr later. To initiate an assay, the shutter  
590 was opened to initiate exposure to blue light simultaneously with a recording  
591 (Flea 3, 0.3 Megapixel, FireWire CCD camera, Point Grey Research) and shutter  
592 opening on a EL6000 metal halide light source generating 10 mW/cm<sup>2</sup> of 470 ±  
593 20 nm blue light via a EGFP filter set mounted on a Leica M165FC  
594 stereomicroscope.

595

## 596 **Molecular biology and transgenes**

597 For overexpression of neuropeptide genes (Fig 2A), fosmid genomic clones  
598 including individual neuropeptide genes were selected from the *C. elegans*  
599 fosmid library (74,75). The fosmids used for four neuropeptide genes were: *nlp-*

600 3, WRM0633dC06; *nlp-8*, WRM0614aB10; *nlp-15*, WRM066cH12; *flp-5*,  
601 WRM0622aF03. For overexpression of a fifth neuropeptide gene, *flp-19*, we  
602 instead PCR amplified genomic DNA containing the 746 bp *flp-19* coding region  
603 along with 5015 bp upstream and 746 bp downstream. Multicopy  
604 extrachromosomal transgenes were generated for each neuropeptide gene by  
605 microinjection (reference), using the fosmid or PCR product at 50 ng/ $\mu$ l along with  
606 the *lin-15* rescuing plasmid pL15EK at 50 ng/ $\mu$ l into *lin-15(n765ts)* mutant  
607 animals. Negative controls were injected with pL15EK without any neuropeptide  
608 gene. Five independent transgenic overexpressor lines were generated for each  
609 injection and Fig 2A shows data averaged from these. Table 1 lists one  
610 representative overexpressor strain for each neuropeptide gene.

611 For determine the effects of overexpressing *nlp-3* in animals lacking  
612 serotonin (Fig 4B), either a ~5 kb PCR product containing the *nlp-3* gene (primers  
613 used were 5'-accaagctaatacaattttgtcaccg-3' and 5'-gcaatacaaccaatcccctttcatctc-  
614 3') or as a control, *E. coli* genomic DNA digested to an average size of ~5 kb,  
615 was injected at 10 ng/ $\mu$ l along with 50 ng/ $\mu$ l of the *lin-15* rescuing plasmid  
616 pL15EK into either *lin-15* or *tph-1; lin-15* animals, and transgenic lines were  
617 identified by rescue of the *lin-15* phenotype. Five independent transgenic lines  
618 were established for each injection, and the early stage egg assay (76) was  
619 carried out on 50 eggs per line (250 eggs total per condition tested). One  
620 representative line for each condition is listed in Table 1.

621

## 622 **Ratiometric Calcium Imaging**

623 Freely-behaving animals were mounted between a glass coverslip and chunked  
624 section of an NGM plate for imaging as described (25,46,47) and recorded with a  
625 20X Plan-Apochromat objective (0.8 NA) using a Zeiss LSM 710 Duo LIVE head  
626 set to record two channels. Recordings were collected at 20 fps at 256 x 256  
627 pixel, 16 bit resolution, for 1 hour. The stage and focus were adjusted manually to  
628 keep the egg-laying system in view and focused during recording periods. Care  
629 was taken to find a lateral focus that included as much of the vm1s and vm2s as  
630 possible. Ratiometric analysis for Ca<sup>2+</sup> recordings was performed in Volocity  
631 (version 5, PerkinElmer). A ratio channel was calculated from GCaMP5 (GFP)  
632 and mCherry fluorescence channels. Volocity was also used to identify the vulval  
633 muscles using size and intensity parameters that varied over a small range  
634 based on individual animals. Any misidentified objects were manually excluded  
635 prior to final analysis. The lowest 10% of the GCaMP5/mCherry ratio values were  
636 averaged to establish a  $\Delta R/R$  baseline using a custom Matlab script. This script  
637 also identifies the peak of a transient based on identifying a change in  
638 prominence that was typically 0.25  $\Delta R/R$  over the preceding second, but this was  
639 adjusted based on the smoothness of the data for individual animals. With the  
640 experimenter blinded to the genotype of the animals being scored, video of each  
641 peak was observed in the ratio channel to determine whether the indicated  
642 activity was restricted to vm1 or present in both vm1 and vm2, and whether an  
643 egg was laid. We scored a transient as vm1-only if it was clear in the ratio



644 channel that there was a difference of more than 50% of maximum activity  
645 between the vm1s and the adjacent regions where vm2 cells were located.

646

#### 647 **Statistical Methods**

648 Statistical analyses were performed using GraphPad Prism for Mac OS X v. 7.0a.

649 95% confidence intervals were determined and 1- or 2-way ANOVA with multiple

650 comparisons were performed to determine statistical significance. For egg stage

651 assays, we used the Wilson-Brown method for determining the 95% confidence

652 intervals for binomial data.

653 **Acknowledgements**

654 We thank Kelly Culhane for assistance with exogenous serotonin

655 assay.

656

## 657 **References**

- 658 1. Nautiyal KM, Hen R. Serotonin receptors in depression: from A to B. *F1000Res*  
659 [Internet]. 2017 Feb 9 [cited 2018 Jan 2];6. Available from:  
660 <https://www.ncbi.nlm.nih.gov/pmc/articles/PMC5302148/>
- 661 2. Baker KG, Halliday GM, Hornung J-P, Geffen LB, Cotton RGH, To'rk I.  
662 Distribution, morphology and number of monoamine-synthesizing and  
663 substance P-containing neurons in the human dorsal raphe nucleus.  
664 *Neuroscience*. 1991;42(3):757–75.
- 665 3. Appel NM, Wessendorf MW, Elde RP. Thyrotropin-releasing hormone in spinal  
666 cord: coexistence with serotonin and with substance P in fibers and terminals  
667 apposing identified preganglionic sympathetic neurons. *Brain Research*. 1987  
668 Jul 7;415(1):137–43.
- 669 4. Henry JN, Manaker S. Colocalization of substance P or enkephalin in  
670 serotonergic neuronal afferents to the hypoglossal nucleus in the rat. *The*  
671 *Journal of Comparative Neurology*. 1998;391(4):491–505.
- 672 5. Hökfelt T, Pernow B, Wahren J. Substance P: a pioneer amongst neuropeptides.  
673 *Journal of Internal Medicine*. 2001 Jan 1;249(1):27–40.
- 674 6. Nakamura M, Yasuda K, Hasumi-Nakayama Y, Sugiura M, Tomita I, Mori R, et al.  
675 Colocalization of serotonin and substance P in the postnatal rat trigeminal  
676 motor nucleus and its surroundings. *International Journal of Developmental*  
677 *Neuroscience*. 2006 Feb;24(1):61–4.
- 678 7. Berger M, Gray JA, Roth BL. The Expanded Biology of Serotonin. *Annual Review*  
679 *of Medicine*. 2009;60(1):355–66.
- 680 8. Hornung J-P. The human raphe nuclei and the serotonergic system. *Journal of*  
681 *Chemical Neuroanatomy*. 2003 Dec 1;26(4):331–43.
- 682 9. Sergeev V, Hökfelt T, Hurd Y. Serotonin and substance P co-exist in dorsal  
683 raphe neurons of the human brain. *Neuroreport*. 1999 Dec 16;10(18):3967–70.
- 684 10. Ptak K, Yamanishi T, Aungst J, Milescu LS, Zhang R, Richerson GB, et al. Raphé  
685 Neurons Stimulate Respiratory Circuit Activity by Multiple Mechanisms via  
686 Endogenously Released Serotonin and Substance P. *J Neurosci*. 2009 Mar  
687 25;29(12):3720–37.
- 688 11. Nusbaum MP, Blitz DM, Marder E. Functional consequences of neuropeptide  
689 and small-molecule co-transmission. *Nat Rev Neurosci*. 2017 Jul;18(7):389–  
690 403.

- 691 12. Burnstock G. Cotransmission. *Current Opinion in Pharmacology*. 2004  
692 Feb;4(1):47–52.
- 693 13. Burnstock G. Do some nerve cells release more than one transmitter?  
694 *Neuroscience*. 1976 Aug;1(4):239–48.
- 695 14. Kupfermann I. Functional studies of cotransmission. *Physiological Reviews*.  
696 1991 Jul 1;71(3):683–732.
- 697 15. Kramer MS, Winokur A, Kelsey J, Preskorn SH, Rothschild AJ, Snavely D, et al.  
698 Demonstration of the efficacy and safety of a novel substance P (NK1) receptor  
699 antagonist in major depression. *Neuropsychopharmacology*. 2004  
700 Feb;29(2):385–92.
- 701 16. Keller M, Montgomery S, Ball W, Morrison M, Snavely D, Liu G, et al. Lack of  
702 Efficacy of the Substance P (Neurokinin1 Receptor) Antagonist Aprepitant in  
703 the Treatment of Major Depressive Disorder. *Biological Psychiatry*. 2006 Feb  
704 1;59(3):216–23.
- 705 17. Ratti E, Bellew K, Bettica P, Bryson H, Zamuner S, Archer G, et al. Results From 2  
706 Randomized, Double-Blind, Placebo-Controlled Studies of the Novel NK1  
707 Receptor Antagonist Casopitant in Patients With Major Depressive Disorder.  
708 *Journal of Clinical Psychopharmacology*. 2011 Dec;31(6):727–733.
- 709 18. Chalasani SH, Kato S, Albrecht DR, Nakagawa T, Abbott LF, Bargmann CI.  
710 Neuropeptide feedback modifies odor-evoked dynamics in *Caenorhabditis*  
711 *elegans* olfactory neurons. *Nat Neurosci*. 2010 May;13(5):615–21.
- 712 19. Harris G, Mills H, Wragg R, Hapiak V, Castelletto M, Korchnak A, et al. The  
713 Monoaminergic Modulation of Sensory-Mediated Aversive Responses in  
714 *Caenorhabditis elegans* Requires Glutamatergic/Peptidergic Cotransmission. *J*  
715 *Neurosci*. 2010 Jun 9;30(23):7889–99.
- 716 20. Schafer WF. Genetics of egg-laying in worms. *Annu Rev Genet*. 2006;40:487–  
717 509.
- 718 21. Kupfermann I, Weiss KR. The command neuron concept. *Behavioral and Brain*  
719 *Sciences*. 1978 Mar;1(1):3–10.
- 720 22. Trent C, Tsung N, Horvitz HR. Egg-Laying Defective Mutants of the Nematode  
721 *Caenorhabditis Elegans*. *Genetics*. 1983 Aug 1;104(4):619–47.
- 722 23. Leifer AM, Fang-Yen C, Gershow M, Alkema MJ, Samuel ADT. Optogenetic  
723 manipulation of neural activity in freely moving *Caenorhabditis elegans*. *Nat*  
724 *Meth*. 2011 Feb;8(2):147–52.

- 725 24. Emtage L, Aziz-Zaman S, Padovan-Merhar O, Horvitz HR, Fang-Yen C, Ringstad  
726 N. IRK-1 Potassium Channels Mediate Peptidergic Inhibition of *Caenorhabditis*  
727 *elegans* Serotonin Neurons via a G<sub>o</sub> Signaling Pathway. *J Neurosci*. 2012 Nov  
728 14;32(46):16285–95.
- 729 25. Collins KM, Bode A, Fernandez RW, Tanis JE, Brewer JC, Creamer MS, et al.  
730 Activity of the *C. elegans* egg-laying behavior circuit is controlled by competing  
731 activation and feedback inhibition. *eLife Sciences*. 2016 Nov 16;5:e21126.
- 732 26. Ellis HM, Horvitz HR. Genetic control of programmed cell death in the  
733 nematode *C. elegans*. *Cell*. 1986 Mar 28;44(6):817–29.
- 734 27. Waggoner LE, Zhou GT, Schafer RW, Schafer WR. Control of alternative  
735 behavioral states by serotonin in *Caenorhabditis elegans*. *Neuron*. 1998  
736 Jul;21(1):203–14.
- 737 28. Sze JY, Victor M, Loer C, Shi Y, Ruvkun G. Food and metabolic signalling defects  
738 in a *Caenorhabditis elegans* serotonin-synthesis mutant. *Nature*. 2000 Feb  
739 3;403(6769):560–4.
- 740 29. Zhang Y, Lu H, Bargmann CI. Pathogenic bacteria induce aversive olfactory  
741 learning in *Caenorhabditis elegans*. *Nature*. 2005 Nov 10;438(7065):179–84.
- 742 30. Schafer WF. Genetics of egg-laying in worms. *Annu Rev Genet*. 2006;40:487–  
743 509.
- 744 31. Weinshenker D, Garriga G, Thomas JH. Genetic and pharmacological analysis of  
745 neurotransmitters controlling egg laying in *C. elegans*. *J Neurosci*. 1995 Oct  
746 1;15(10):6975–85.
- 747 32. Hobson RJ, Hapiak VM, Xiao H, Buehrer KL, Komuniecki PR, Komuniecki RW.  
748 SER-7, a *Caenorhabditis elegans* 5-HT7-like Receptor, Is Essential for the 5-HT  
749 Stimulation of Pharyngeal Pumping and Egg Laying. *Genetics*. 2006 Jan  
750 1;172(1):159–69.
- 751 33. Bany IA, Dong M-Q, Koelle MR. Genetic and Cellular Basis for Acetylcholine  
752 Inhibition of *Caenorhabditis elegans* Egg-Laying Behavior. *J Neurosci*. 2003 Sep  
753 3;23(22):8060–9.
- 754 34. Nathoo AN, Moeller RA, Westlund BA, Hart AC. Identification of neuropeptide-  
755 like protein gene families in *Caenorhabditis elegans* and other species. *PNAS*.  
756 2001 Nov 20;98(24):14000–5.
- 757 35. Kim K, Li C. Expression and regulation of an FMRFamide-related neuropeptide  
758 gene family in *Caenorhabditis elegans*. *J Comp Neurol*. 2004;475(4):540–50.

- 759 36. Altun ZF, Herndon LA, Wolkow CA, Crocker C, Lints R, Hall DH, editors.  
760 WormAtlas [Internet]. 2017. Available from: <http://www.wormatlas.org>
- 761 37. Ringstad N, Horvitz HR. FMRFamide neuropeptides and acetylcholine  
762 synergistically inhibit egg-laying by *C. elegans*. *Nat Neurosci*. 2008  
763 Oct;11(10):1168–76.
- 764 38. Chase DL, Koelle MR. Genetic Analysis of RGS Protein Function in  
765 *Caenorhabditis elegans*. In: *Methods in Enzymology* [Internet]. Academic Press;  
766 2004 [cited 2017 Oct 15]. p. 305–20. (Regulators of G-Protein Signaling, Part A;  
767 vol. 389). Available from:  
768 <http://www.sciencedirect.com/science/article/pii/S0076687904890189>
- 769 39. Horvitz HR, Chalfie M, Trent C, Sulston JE, Evans PD. Serotonin and octopamine  
770 in the nematode *Caenorhabditis elegans*. *Science*. 1982 May  
771 28;216(4549):1012–4.
- 772 40. Desai C, Garriga G, McIntire SL, Horvitz HR. A genetic pathway for the  
773 development of the *Caenorhabditis elegans* HSN motor neurons. , Published  
774 online: 15 December 1988; | doi:101038/336638a0. 1988 Dec  
775 15;336(6200):638–46.
- 776 41. Harris G, Mills H, Wragg R, Hapiak V, Castelletto M, Korchnak A, et al. The  
777 Monoaminergic Modulation of Sensory-Mediated Aversive Responses in  
778 *Caenorhabditis elegans* Requires Glutamatergic/Peptidergic Cotransmission. *J*  
779 *Neurosci*. 2010 Jun 9;30(23):7889–99.
- 780 42. Carnell L, Illi J, Hong SW, McIntire SL. The G-Protein-Coupled Serotonin  
781 Receptor SER-1 Regulates Egg Laying and Male Mating Behaviors in  
782 *Caenorhabditis elegans*. *J Neurosci*. 2005 Nov 16;25(46):10671–81.
- 783 43. Dernovici S, Starc T, Dent JA, Ribeiro P. The serotonin receptor SER-1 (5HT2ce)  
784 contributes to the regulation of locomotion in *Caenorhabditis elegans*.  
785 *Developmental Neurobiology*. 2007;67(2):189–204.
- 786 44. Dempsey CM, Mackenzie SM, Gargus A, Blanco G, Sze JY. Serotonin (5HT),  
787 fluoxetine, imipramine and dopamine target distinct 5HT receptor signaling to  
788 modulate *Caenorhabditis elegans* egg-laying behavior. *Genetics*. 2005  
789 Mar;169(3):1425–36.
- 790 45. White JG, Southgate E, Thomson JN, Brenner S. The Structure of the Nervous  
791 System of the Nematode *Caenorhabditis elegans*. *Phil Trans R Soc Lond B*. 1986  
792 Nov 12;314(1165):1–340.
- 793 46. Collins KM, Koelle MR. Postsynaptic ERG Potassium Channels Limit Muscle  
794 Excitability to Allow Distinct Egg-Laying Behavior States in *Caenorhabditis*  
795 *elegans*. *J Neurosci*. 2013 Jan 9;33(2):761–75.

- 796 47. Ravi B, Nassar LM, Kopchock RJ, Dhakal P, Scheetz M, Collins KM. Ratiometric  
797 Calcium Imaging of Individual Neurons in Behaving *Caenorhabditis Elegans*. *J*  
798 *Vis Exp*. 2018 Feb 7;(132).
- 799 48. Li P, Collins KM, Koelle MR, Shen K. LIN-12/Notch signaling instructs  
800 postsynaptic muscle arm development by regulating UNC-40/DCC and MADD-2  
801 in *Caenorhabditis elegans*. *eLife* [Internet]. 2013 Mar 19 [cited 2014 Nov 25];2.  
802 Available from: <http://www.ncbi.nlm.nih.gov/pmc/articles/PMC3601818/>
- 803 49. Pearson KG. Common principles of motor control in vertebrates and  
804 invertebrates. *Annu Rev Neurosci*. 1993;16:265–97.
- 805 50. Gao S, Guan SA, Fouad AD, Meng J, Kawano T, Huang Y-C, et al. Excitatory motor  
806 neurons are local oscillators for backward locomotion. *eLife Sciences*. 2018 Jan  
807 23;7:e29915.
- 808 51. Hapiak VM, Hobson RJ, Hughes L, Smith K, Harris G, Condon C, et al. Dual  
809 Excitatory and Inhibitory Serotonergic Inputs Modulate Egg Laying in  
810 *Caenorhabditis elegans*. *Genetics*. 2009 Jan 1;181(1):153–63.
- 811 52. Xiao H, Hapiak VM, Smith KA, Lin L, Hobson RJ, Plenefisch J, et al. SER-1, a  
812 *Caenorhabditis elegans* 5-HT<sub>2</sub>-like receptor, and a multi-PDZ domain  
813 containing protein (MPZ-1) interact in vulval muscle to facilitate serotonin-  
814 stimulated egg-laying. *Developmental Biology*. 2006 Oct 15;298(2):379–91.
- 815 53. Gürel G, Gustafson MA, Pepper JS, Horvitz HR, Koelle MR. Receptors and Other  
816 Signaling Proteins Required for Serotonin Control of Locomotion in  
817 *Caenorhabditis elegans*. *Genetics* [Internet]. 2012 Sep 28 [cited 2012 Oct 11];  
818 Available from:  
819 <http://www.genetics.org/content/early/2012/09/27/genetics.112.142125>
- 820 54. Fei H, Grygoruk A, Brooks ES, Chen A, Krantz DE. Trafficking of Vesicular  
821 Neurotransmitter Transporters. *Traffic*. 2008 Sep 1;9(9):1425–36.
- 822 55. Torrealba F, Carrasco MA. A review on electron microscopy and  
823 neurotransmitter systems. *Brain Research Reviews*. 2004 Dec 1;47(1):5–17.
- 824 56. Merighi A. Costorage and coexistence of neuropeptides in the mammalian CNS.  
825 *Progress in Neurobiology*. 2002 Feb 1;66(3):161–90.
- 826 57. Mansvelder HD, Kits KS. Calcium channels and the release of large dense core  
827 vesicles from neuroendocrine cells: spatial organization and functional  
828 coupling. *Progress in Neurobiology*. 2000 Nov 1;62(4):427–41.
- 829 58. M G, Eg A, O H. A cellular and regulatory map of the GABAergic nervous system  
830 of *C. elegans*., A cellular and regulatory map of the GABAergic nervous system  
831 of *C. elegans*. *Elife* [Internet]. 2016 [cited 2017 Jul 21];5, 5. Available from:

- 832 <http://europepmc.org/abstract/MED/27740909>,  
833 <http://europepmc.org/articles/PMC5065314/?report=abstract>
- 834 59. Ritter AD, Shen Y, Fuxman Bass J, Jeyaraj S, Deplancke B, Mukhopadhyay A, et  
835 al. Complex expression dynamics and robustness in *C. elegans* insulin  
836 networks. *Genome Res.* 2013 Jun;23(6):954–65.
- 837 60. Croset V, Treiber CD, Waddell S. Cellular diversity in the *Drosophila* midbrain  
838 revealed by single-cell transcriptomics. *eLife Sciences.* 2018 Apr 19;7:e34550.
- 839 61. Nässel DR. Substrates for Neuronal Cotransmission With Neuropeptides and  
840 Small Molecule Neurotransmitters in *Drosophila*. *Front Cell Neurosci*  
841 [Internet]. 2018 [cited 2018 May 14];12. Available from:  
842 <https://www.frontiersin.org/articles/10.3389/fncel.2018.00083/full>
- 843 62. Hökfelt T, Millhorn D, Seroogy K, Tsuruo Y, Ceccatelli S, Lindh B, et al.  
844 Coexistence of peptides with classical neurotransmitters. *Experientia.* 1987 Jul  
845 1;43(7):768–80.
- 846 63. Marder E. Neuromodulation of Neuronal Circuits: Back to the Future. *Neuron.*  
847 2012 Oct 4;76(1):1–11.
- 848 64. Marder E. Neuromodulation of Neuronal Circuits: Back to the Future. *Neuron.*  
849 2012 Oct 4;76(1):1–11.
- 850 65. Leinwand SG, Chalasani SH. Neuropeptide signaling remodels chemosensory  
851 circuit composition in *Caenorhabditis elegans*. *Nat Neurosci.* 2013  
852 Oct;16(10):1461–7.
- 853 66. Brenner S. The Genetics of *Caenorhabditis Elegans*. *Genetics.* 1974 May  
854 1;77(1):71–94.
- 855 67. Evans T. Transformation and microinjection. *WormBook* [Internet]. 2006 [cited  
856 2017 Oct 15]; Available from:  
857 [http://www.wormbook.org/chapters/www\\_transformationmicroinjection/transformationmicroinjection.html](http://www.wormbook.org/chapters/www_transformationmicroinjection/transformationmicroinjection.html)  
858
- 859 68. Fay DS. Classical genetic methods. *WormBook.* 2013 Dec 30;1–58.
- 860 69. Bhatla N, Droste R, Sando SR, Huang A, Horvitz HR. Distinct Neural Circuits  
861 Control Rhythm Inhibition and Spitting by the Myogenic Pharynx of *C. elegans*.  
862 *Current Biology.* 2015 Aug 17;25(16):2075–89.
- 863 70. Sze JY, Victor M, Loer C, Shi Y, Ruvkun G. Food and metabolic signalling defects  
864 in a *Caenorhabditis elegans* serotonin-synthesis mutant. *Nature.* 2000 Feb  
865 3;403(6769):560–4.



- 866 71. Chase DL, Koelle MR. Genetic Analysis of RGS Protein Function in  
867 *Caenorhabditis elegans*. In: *Methods in Enzymology* [Internet]. Academic Press;  
868 2004 [cited 2017 Oct 15]. p. 305–20. Available from:  
869 <http://www.sciencedirect.com/science/article/pii/S0076687904890189>
- 870 72. Leifer AM, Fang-Yen C, Gershow M, Alkema MJ, Samuel ADT. Optogenetic  
871 manipulation of neural activity in freely moving *Caenorhabditis elegans*. *Nat*  
872 *Meth*. 2011 Feb;8(2):147–52.
- 873 73. Emtage L, Aziz-Zaman S, Padovan-Merhar O, Horvitz HR, Fang-Yen C, Ringstad  
874 N. IRK-1 Potassium Channels Mediate Peptidergic Inhibition of *Caenorhabditis*  
875 *elegans* Serotonin Neurons via a G<sub>o</sub> Signaling Pathway. *J Neurosci*. 2012 Nov  
876 14;32(46):16285–95.
- 877 74. *C. elegans* Fosmid Library [Internet]. [cited 2017 Oct 15]. Available from:  
878 [https://www.sourcebioscience.com/products/life-science-](https://www.sourcebioscience.com/products/life-science-research/clones/genomic-clones/c-elegans-genomic-clone-collections/c-elegans-fosmid-library/)  
879 [research/clones/genomic-clones/c-elegans-genomic-clone-collections/c-](https://www.sourcebioscience.com/products/life-science-research/clones/genomic-clones/c-elegans-genomic-clone-collections/c-elegans-fosmid-library/)  
880 [elegans-fosmid-library/](https://www.sourcebioscience.com/products/life-science-research/clones/genomic-clones/c-elegans-genomic-clone-collections/c-elegans-fosmid-library/)
- 881 75. Perkins J, Wong K, Warren R, Schein J, Stott J, Holt R, et al. A *Caenorhabditis*  
882 *elegans* fosmid library. In: *International Worm Meeting* [Internet]. 2005 [cited  
883 2017 Oct 15]. Available from:  
884 <http://www.wormbase.org/db/misc/paper?name=WBPaper00026350>
- 885 76. Chase DL, Koelle MR. Genetic Analysis of RGS Protein Function in  
886 *Caenorhabditis elegans*. In: *Methods in Enzymology* [Internet]. Academic Press;  
887 2004 [cited 2018 Jan 4]. p. 305–20. (Regulators of G-Protein Signaling, Part A;  
888 vol. 389). Available from:  
889 <http://www.sciencedirect.com/science/article/pii/S0076687904890189>
- 890 77. Edwards SL, Charlie NK, Milfort MC, Brown BS, Gravlin CN, Knecht JE, et al. A  
891 Novel Molecular Solution for Ultraviolet Light Detection in *Caenorhabditis*  
892 *elegans*. *PLOS Biology*. 2008 Aug 5;6(8):e198.
- 893 78. Edwards SL, Charlie NK, Milfort MC, Brown BS, Gravlin CN, Knecht JE, et al. A  
894 Novel Molecular Solution for Ultraviolet Light Detection in *Caenorhabditis*  
895 *elegans*. *PLOS Biology*. 2008 Aug 5;6(8):e198.
- 896

897

## 898 **Figure Legends**

### 899 **Fig 1. Serotonin is not required for the HSN to stimulate egg laying. A)**

900 Schematic of the *C. elegans* egg-laying circuit, adapted from (25). HSN and VC  
901 motorneurons synapse onto vm2 vulval muscles, which along with vm1 muscles  
902 contract to open the vulva and release eggs. Only the left HSN and vm cells are  
903 shown – equivalent cells are also found on the right side of the animal. The uv1  
904 neuroendocrine cells that inhibit the circuit are not shown. **B-D)** Images of  
905 representative animals of the indicated genotypes, showing the average number  
906 of unlaied eggs +/- 95% confidence intervals, n=30. Arrowheads indicate individual  
907 unlaied eggs. Asterisks indicate the location of the vulva. **E)** Average number of  
908 eggs laid during 60 seconds of blue light exposure by animals expressing ChR2  
909 in the HSNs. Both control and *tph-1* animals also have *lite-1(ce314)* mutations  
910 that eliminates a locomotion response to blue light (77). Black bars indicate  
911 animals that were grown for a generation in the presence of ChR2's required  
912 cofactor all-trans retinal (ATR). White bars indicate negative control animals  
913 grown in the absence of ATR. Error bars, 95% confidence intervals, n=20, n.s.,  
914 no statistically significant difference,  $\emptyset$ , no egg laying observed.

### 915 **Fig 2. The neuropeptide gene *nlp-3*, together with serotonin, stimulates**

916 **egg laying. A)** Overexpression of *nlp-3*, but not of four other neuropeptide  
917 genes, increased the rate of egg-laying behavior. Genomic clones for each

918 neuropeptide gene, or the coinjection marker alone (control), were injected into  
919 *C. elegans* to generate high-copy extrachromosomal transgenes. For each gene,  
920 250 freshly laid eggs (50 from each of five independent transgenic lines) were  
921 examined and the percent laid at early stages of development (eight cells or  
922 fewer) was determined. Error bars, 95% confidence intervals. **B-C)**  
923 Representative images of *nlp-3* and *tph-1; nlp-3* animals showing the average  
924 number of unlaied eggs (n=30). **D)** Histogram of the average unlaied eggs for the  
925 strains indicated. Two independent deletion alleles of *nlp-3* were used. n≥30 for  
926 each strain; error bars, 95% confidence intervals. *tph-1* and the two independent  
927 *nlp-3* mutants accumulated significantly more eggs than did the wild type, and  
928 significantly fewer than did the *tph-1; nlp-3* double mutant strains ( $p \leq 0.05$ ,  
929 Student's t-test). *egl-1* mutants were not significantly different from *tph-1; nlp-*  
930 *3(n4897)*.

931 **Fig 3. The HSNs require the *nlp-3* neuropeptide gene and *tph-1* to stimulate**  
932 **egg laying. A)** *nlp-3* is expressed specifically in the HSNs. Vulval region of an  
933 adult animal carrying an *nlp-3::GFP* transgene, and a second transgene that  
934 expresses mCherry in the vulval muscles from the *unc-103e* promoter (46). **B)**  
935 The *egl-6p::ChR2-YFP* transgene is expressed specifically in the HSN. In A and  
936 B, asterisks indicate the vulva. Filled arrowheads the HSN cell body, and open  
937 arrowheads the HSN synapse onto the vulval muscles. **C)** Average number of  
938 eggs laid during 60 seconds of blue light exposure by animals expressing ChR2-  
939 YFP in the HSNs, and carrying the indicated null mutations in *tph-1* and/or *nlp-3*.

940 Control, animals wild type for *tph-1* and *nlp-3*. Black bars, animals grown in the  
941 presence of ChR2's required cofactor all-trans retinal (ATR). White bars, animals  
942 grown in the absence of ATR. All animals in this experiment were homozygous  
943 for a *lite-1* mutation that abolished an endogenous *C. elegans* response to blue  
944 light (78). Error bars, 95% confidence intervals, n=20. ∅, no egg laying was  
945 observed.

946 **Fig 4. Serotonin and NLP-3 neuropeptides can stimulate egg laying in the**  
947 **absence of each other. A)** Exogenous serotonin stimulates egg laying in wild  
948 type and *nlp-3* animals. The number of eggs laid by 10 animals over 30 minutes  
949 in plain buffer or buffer plus serotonin was measured, averaging 10 replicates per  
950 genotype. The *ser-1* serotonin receptor null mutant is the negative control. **B)** *nlp-*  
951 *3* overexpression stimulates egg laying even in the absence of serotonin.  
952 Animals wild-type for *tph-1* or *tph-1* null mutants were injected with marker DNA  
953 alone (control), or *nlp-3* genomic DNA plus marker DNA to overexpress *nlp-3*  
954 (*nlp-3* ox). In each case, five independent transgenic lines were produced, and  
955 50 freshly laid eggs per line (250 eggs total per condition) were examined to  
956 determine their developmental stages. Error bars, 95% confidence intervals.

957

958 **Fig. 5. Vulval muscle activity, but not egg release, occurs frequently in**  
959 **mutants lacking serotonin, NLP-3, or both. A)** Graphs of Ca<sup>2+</sup> transients  
960 showing ΔR/R of GCaMP5/mCherry signal recorded over 1 hour for three

961 different animals per genotype. ▼ indicates a calcium transient associated with  
962 an egg-laying event. “2x” indicates that two eggs were laid nearly simultaneously  
963 during the same calcium transient. Scale bar, 10 minutes. Vertical scales have  
964 been normalized to depict comparable peak heights in all animals shown. **B)** Still  
965 frames from ratiometric recordings. The mCherry channel is rendered in blue.  
966 The mCherry channel is rendered in green, with a scale of intensity ranging from  
967 transparent, low intensity to greener high intensity. Schematics are shown below  
968 the images to distinguish the muscle types and indicate where activity appears to  
969 occur. **C)** A graph of the number and proportion of calcium transients occurring in  
970 the vm1s only compared to those appearing to occur in both vm1 and vm2 for  
971 each genotype. Error bars show 95% confidence intervals for the proportion that  
972 would result from an infinite number of observations.

973

974

975

976 **Fig 6. Model depicting signaling events that activate the egg-laying circuit.**

977 Solid arrows, synaptic signaling; dashed arrow, extrasynaptic signaling; and bar,  
978 gap junctions. vm1 and vm2 cells are known to express multiple serotonin  
979 receptor isoforms that each mediate activation of egg laying. The signaling of  
980 serotonin onto VC neurons (arrow 3) remains hypothetical since no serotonin  
981 receptors have yet been described as expressed on these neurons. The possible

982 direct signaling of NLP-3 depicted onto vm1 (arrow 2), vm2 (arrow 2), or and/or  
983 VC (arrow 3) are also hypothetical: NLP-3 receptors have yet to be identified, and  
984 it thus remains unknown which cell(s) of the circuit express them.

985

986

## 987 **Supporting Information Captions**

988 **Fig S1. Animals homozygous for the *egl-6::ChR2::YFP* transgene have**  
989 **visibly defective HSNs. A-B)** Vulval region of an adult homozygote for the *egl-*  
990 *6p::ChR2::YFP* transgene. Abnormal HSN morphology can be seen by  
991 comparing to normal HSN morphology in Fig. S1B. Asterisk, location of the  
992 vulva. B) Vulval region of an adult heterozygote for the *egl-6p::ChR2::YFP*  
993 transgene. This is the same image seen in Fig 3B, repeated here for comparison  
994 to Fig S1A.

995

996 **Fig S2. A *tph-1* null mutation does not detectably affect egg laying upon**  
997 **optogenetic activation of HSNs.** Measurements of egg-laying upon blue light  
998 stimulation of egg-laying in *egl-6p::ChR2::YFP/+* animals that were controls (wild  
999 type for *tph-1* and *nlp-3*) or that carried null mutations in *tph-1* or *nlp-3*. All  
1000 animals also had a *lite-1(ce314)* mutation that eliminates endogenous responses  
1001 to blue light. **A)** Average time from onset of blue light stimulation to first egg laid,  
1002 measured as in (73). There was no significant difference between control and  
1003 *tph-1* animals, but *nlp-3* animals initiated egg laying more slowly and with higher  
1004 animal-to-animal variability, and 7/20 *nlp-3* animals tested failed to lay any eggs.  
1005 Center line is the mean, error bars are 95% confidence intervals. n.s., no  
1006 significant difference, \*,  $p < 0.033$ , \*\*\*,  $p < 0.001$ . **B)** Cumulative distribution plot of  
1007 the time to last egg laid during the 60 second blue light illumination experiment.

1008 One Gaussian curve fit both control and *tph-1* data for last egg laid during the  
1009 assay. **C) Plots of raw dating showing the time point of each egg laid by each**  
1010 genotype. Each of 20 animals tested per genotype is represented by a vertical  
1011 column, with each point indicating the time after the onset of blue light  
1012 illumination when an individual egg was laid Empty columns indicate that no eggs  
1013 were laid. Two or three horizontally adjacent points indicate eggs laid  
1014 simultaneously within the 0.05 sec time resolution of our video recording.

1015 **Fig S3. Egg-laying events are associated with coordinated vm1 + vm2 Ca<sup>2+</sup>**  
1016 **transients.** The number and proportion of either vm1 or vm1+vm2 coordinated  
1017 transients that are associated with egg-laying events. One exceptional egg-laying  
1018 event in an *egl-1* animal occurred after a vm1-only transient, while all 57 others  
1019 occurred during coordinated vm1+vm2 events. Error bars are 95% confidence  
1020 intervals for the results expected if an infinite sample size was used.



**Figure 1**

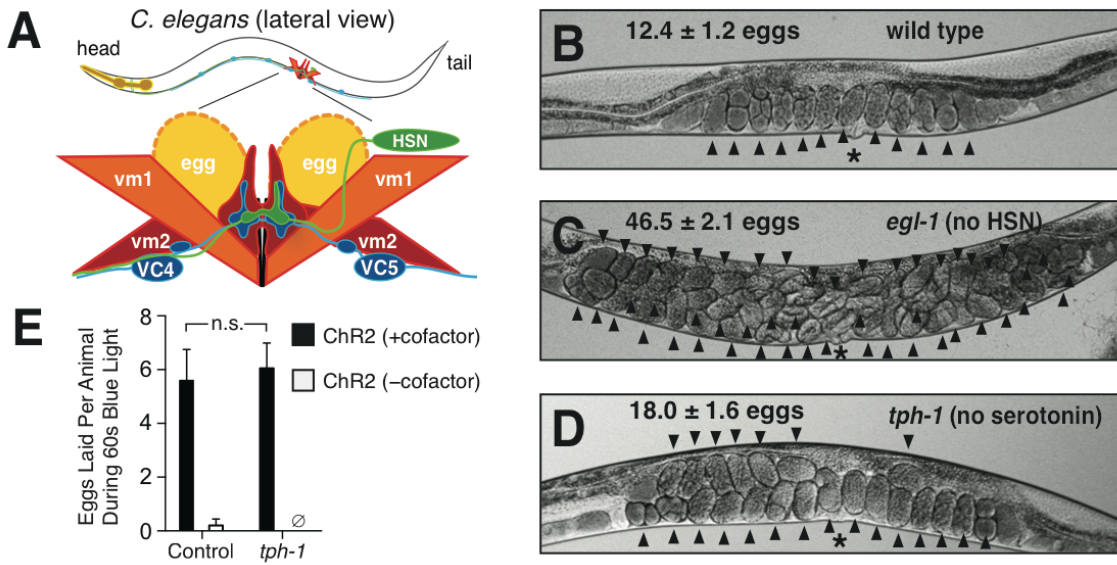

1021

**Figure 2**

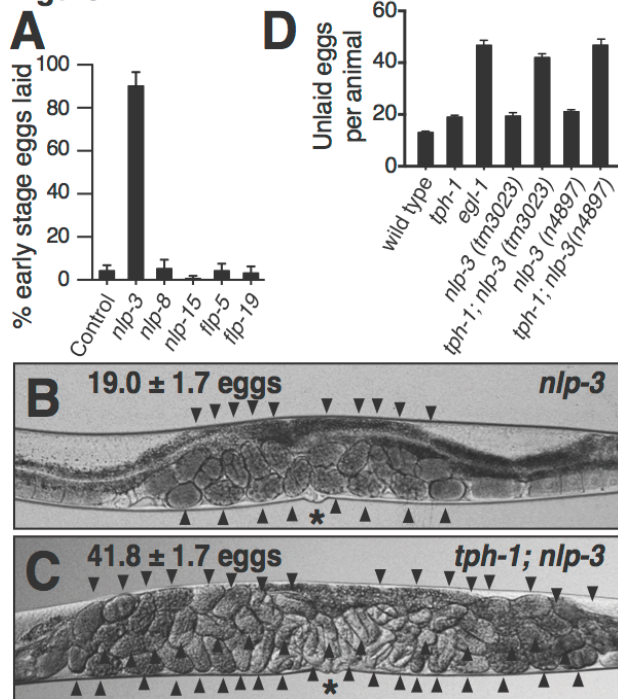

1022

**Figure 3**

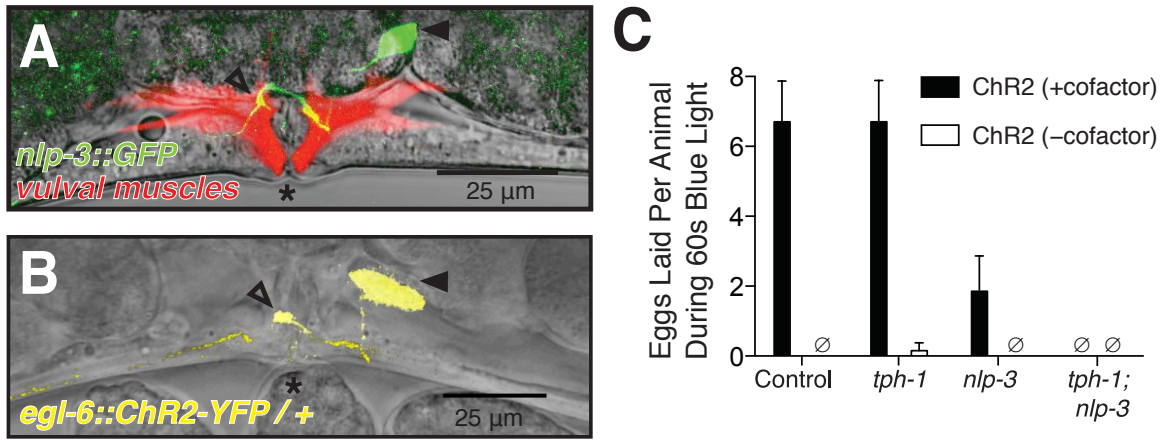

1023

**Figure 4**

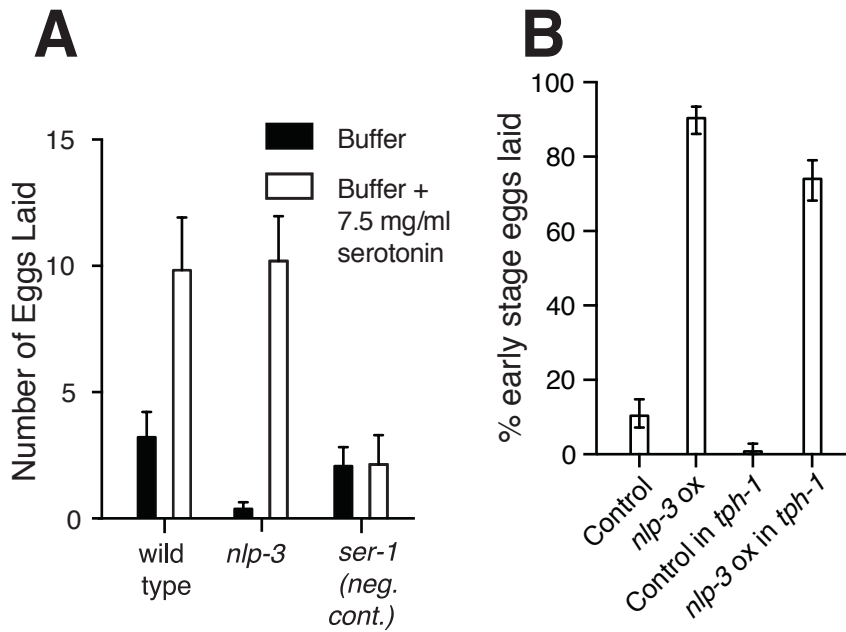

1024

1025

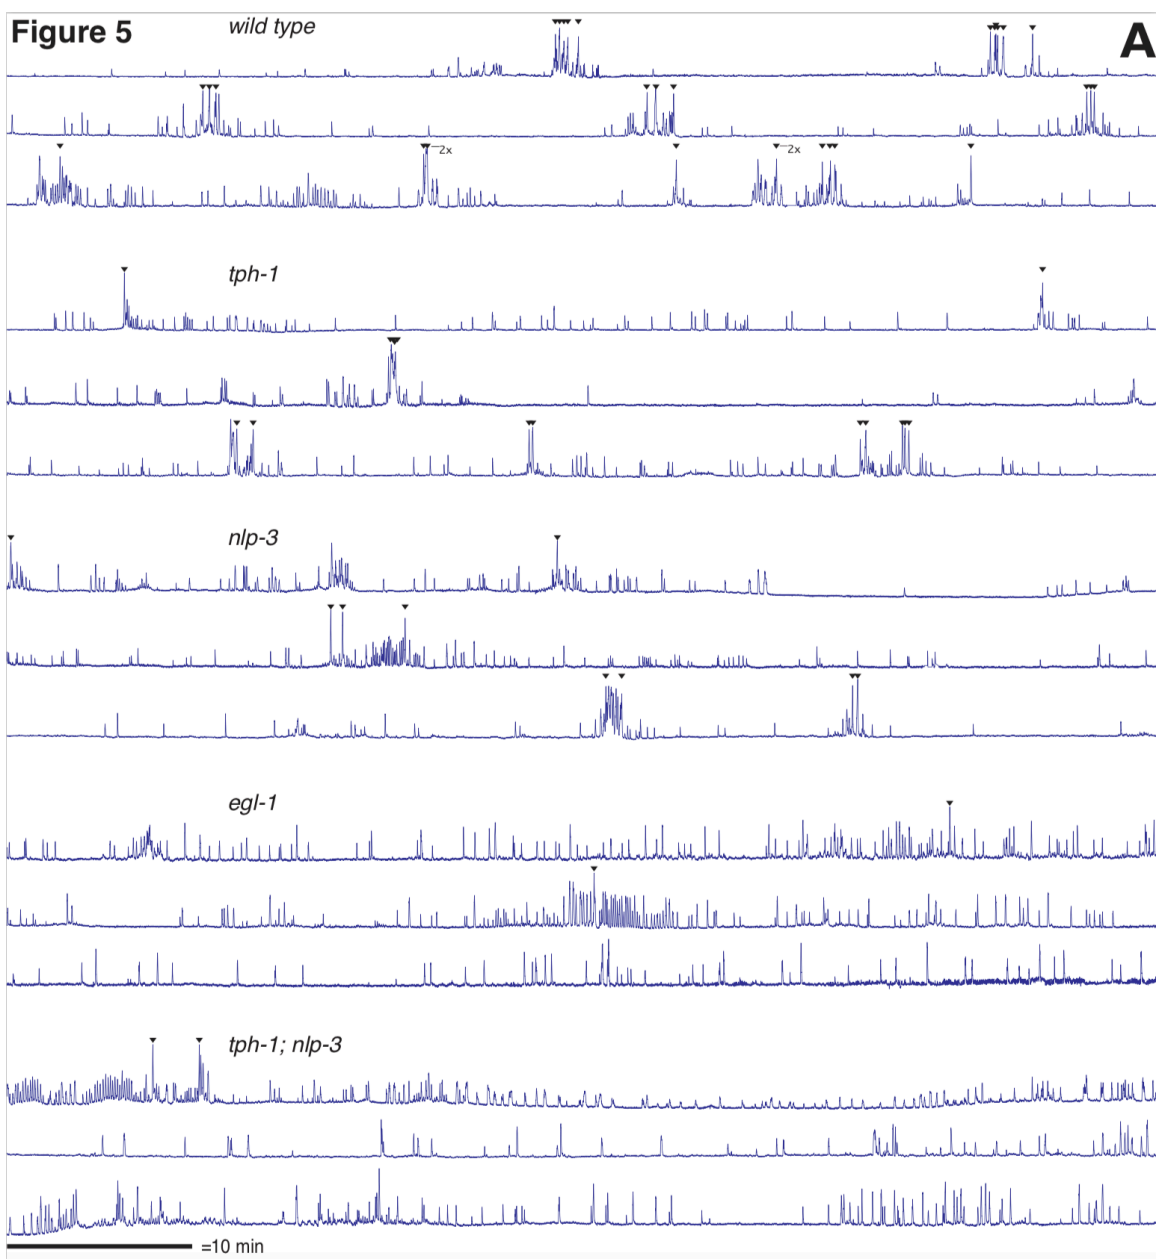

1026

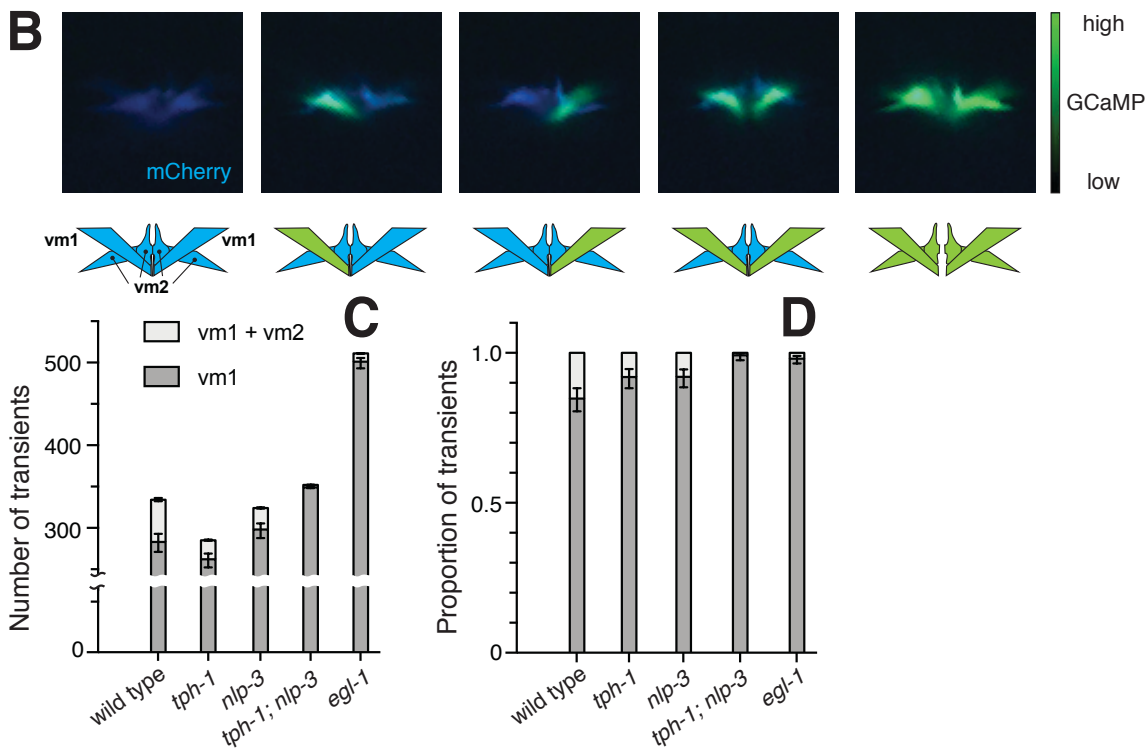

1027

1028 **Figure 6**

1029

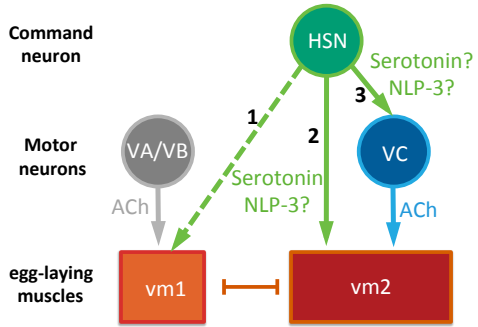

1030

**Figure S1**

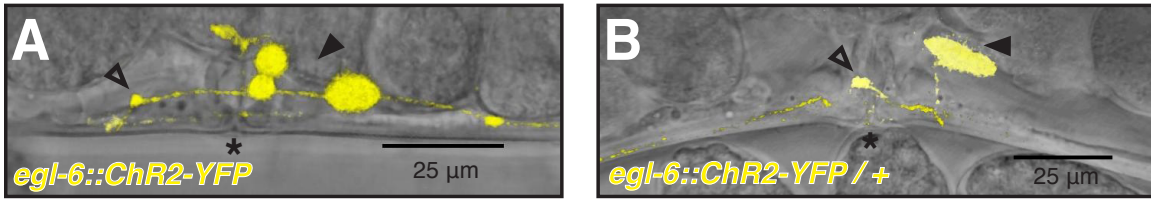

**Figure S2**

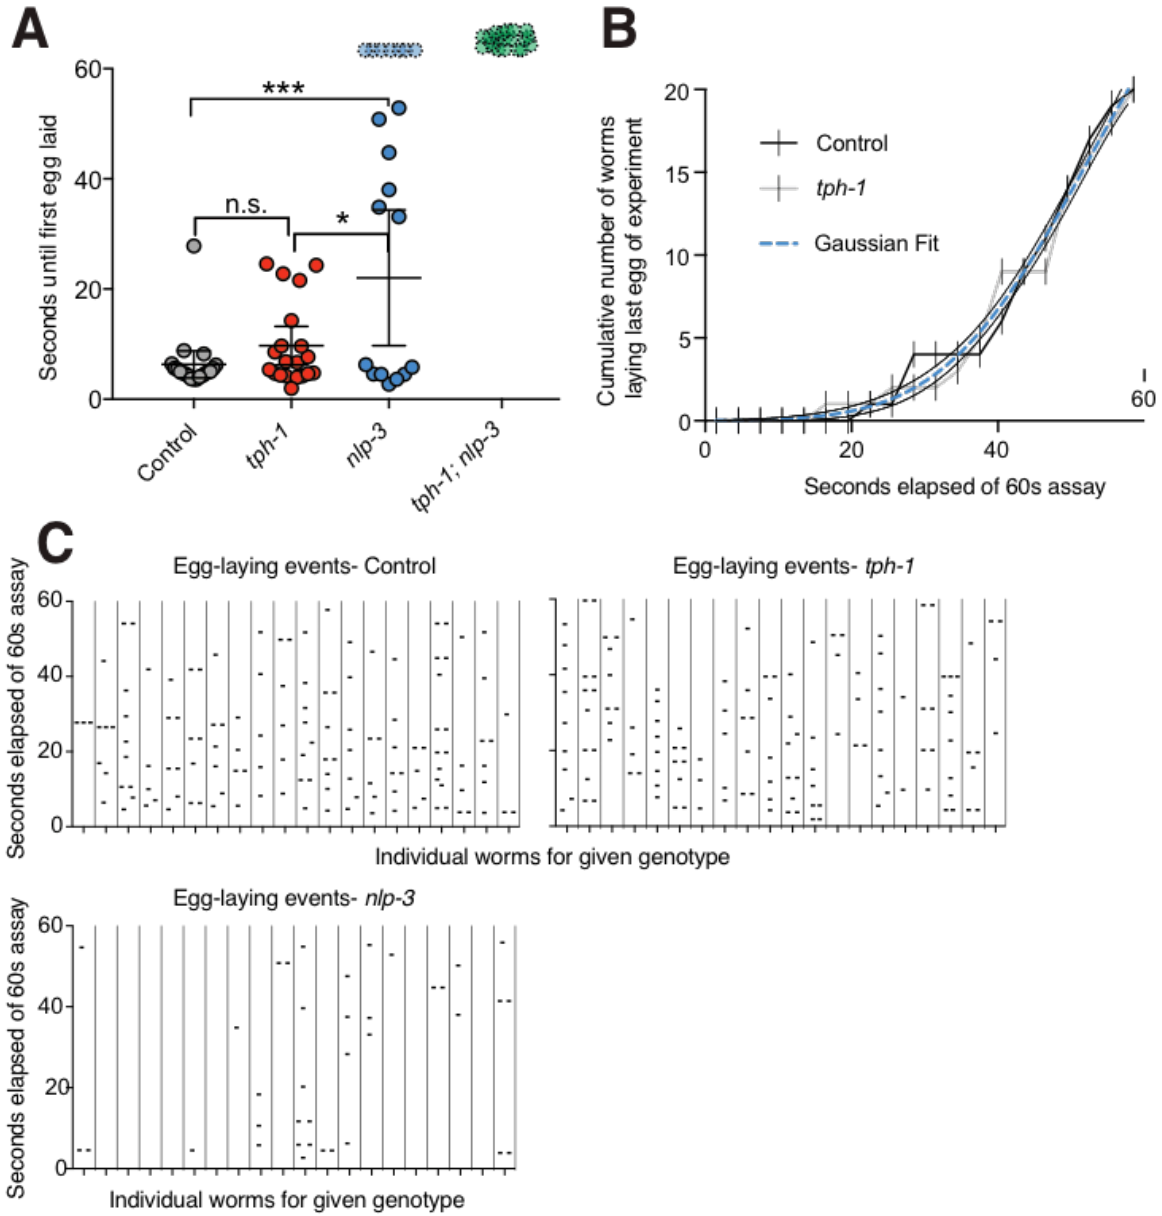

1031

1032

**Figure S3**

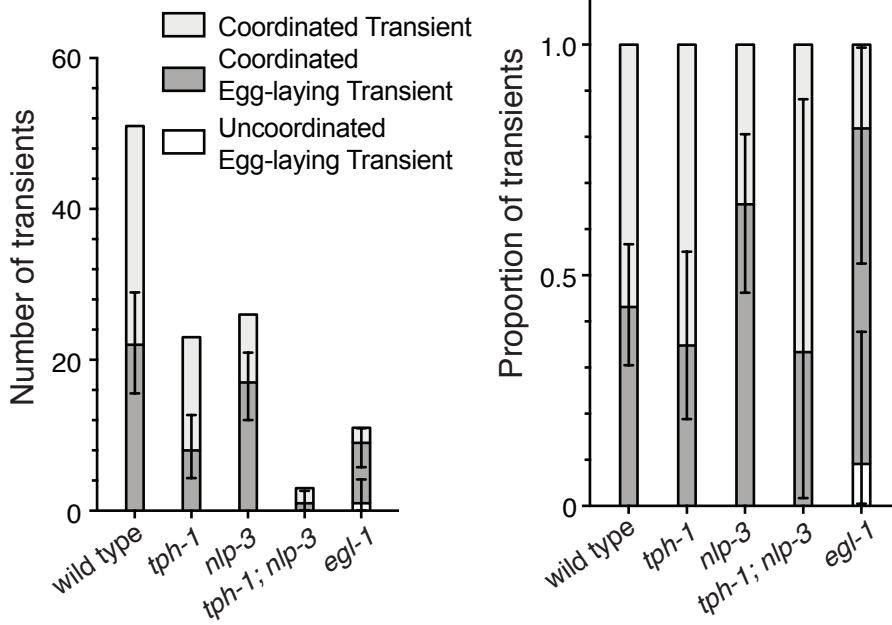

1033

1034

1035
